# Supplementary material for: Golgi clustering by the deficiency of COPI-SNARE in Drosophila photoreceptors
Source: PubMed Central journal article supplement (PMC11408282; doi:10.3389/fcell.2024.1442198), 2024-09-04
Supplement: DataSheet1.pdf [file DataSheet1.pdf]

*Supplementary Material*

Tago et al., Figure S1

A wild type

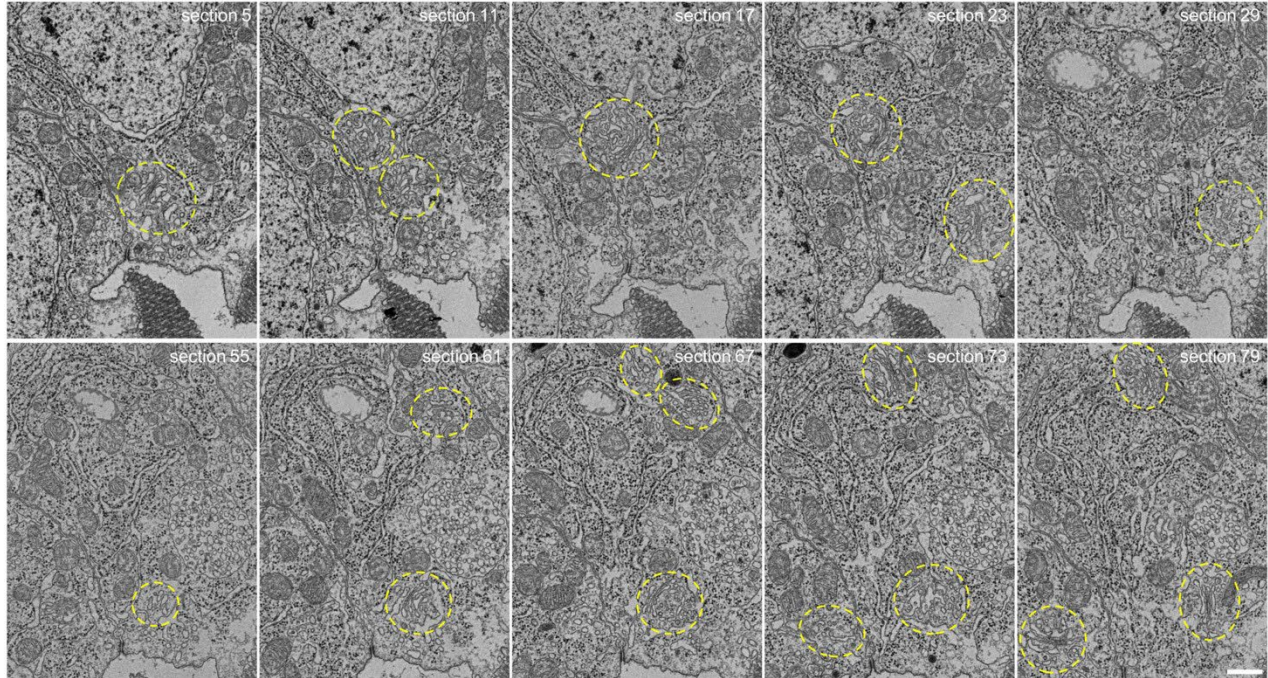

B *Bet1* RNAi

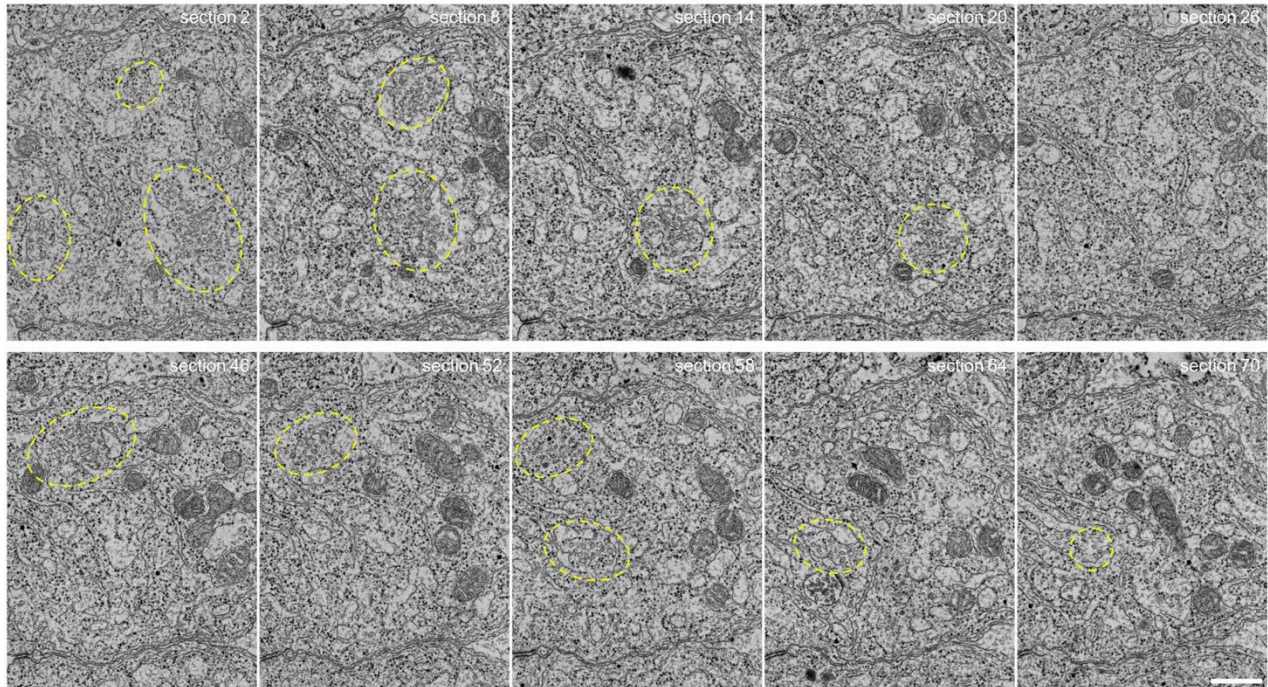

## **Supplementary Figure 1. Vesicle clusters in Syx5 knockdown photoreceptor.**

(A) Serial sections of Golgi stacks at 50-nm intervals in the wild-type photoreceptor, numbered as indicated. Golgi stacks circled with yellow lines.

(B) Serial sections of Vesicle clusters at 50-nm intervals in the Bet1RNAi construct-expressing photoreceptors using eyeless-CoinFLP-lonGMR-Gal4, numbered as indicated. Vesicle clusters circled with yellow lines.

Scale bars: 500 nm (A, B).

### **Movie 1. Golgi stacks in wild-type photoreceptors**

Serial sections of Golgi stacks at 50-nm intervals in the wild-type photoreceptor.

Scale bars: 500 nm.

### **Movie 2. Golgi stacks in Use1 knockdown photoreceptors**

Serial sections of Golgi stacks at 50-nm intervals in the Use1RNAi construct-expressing photoreceptors using eyeless-CoinFLP-Act5C-Gal4.

Scale bars: 500 nm.

### **Movie 3. Golgi stacks in Bet1 knockdown photoreceptors**

Serial sections of Golgi stacks at 50-nm intervals in the Bet1RNAi construct-expressing photoreceptors using eyeless-CoinFLP-longGMR-Gal4.

Scale bars: 500 nm.
